# Supplementary material for: Central amygdala CRF+ neurons promote heightened threat reactivity following early life adversity in mice
Source: PubMed Central journal article supplement (PMC11217353; doi:10.1038/s41467-024-49828-3), 2024-06-29
Supplement: 41467_2024_49828_MOESM1_ESM.pdf [file 41467_2024_49828_MOESM1_ESM.pdf]

Supplementary Figures 1 – 4.

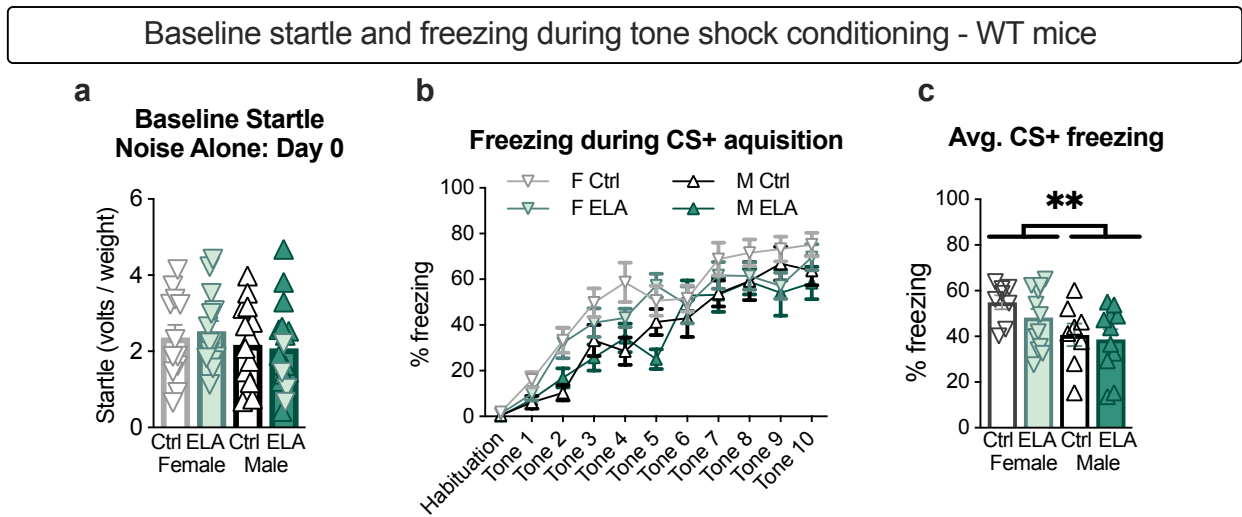

**Supplementary Figure 1: Behavioral phenotypes in WT mice.**

**a)** Baseline startle was measured on Day 0, prior to cued-fear conditioning. Baseline startle reactivity to the WN was not impacted by sex, or rearing condition (2-way ANOVA<sub>sex</sub>  $F_{(1, 53)} = 1.25$ ,  $p = 0.26$ ,  $\eta^2 = 0.14$ ,  $\alpha = 0.18$ ; 2-way ANOVA<sub>rearing</sub>  $F_{(1, 53)} = 0.01$ ,  $p = 0.90$ ,  $\eta^2 = 0.01$ ,  $\alpha = 0.05$ ).  $n = 12$  (F Ctrl), 14 (F ELA, M Ctrl), 17 (M ELA).

**b)** Female WT mice exhibit accelerated, and increased conditioned freezing compared to males (3-way RM ANOVA<sub>sex x trial</sub>  $F_{(10, 360)} = 2.09$ ,  $p = 0.02$ ,  $\eta^2 = 0.22$ ,  $\alpha = 0.98$ ; 3-way RM ANOVA<sub>sex</sub>  $F_{(1, 36)} = 7.98$   $p = 0.007$ ,  $\eta^2 = 0.38$ ,  $\alpha = 0.99$ ; 3-way RM ANOVA<sub>trial</sub>  $F_{(6.9, 249.9)} = 81.9$ ,  $p < 0.001$ ,  $\eta^2 = 1.49$ ,  $\alpha = 1.0$ ).  $n = 8$  (F Ctrl, M Ctrl), 11 (M ELA), 13 (F ELA).

**c)** Avg. freezing across 10 tones was higher in female mice compared to male (2-way ANOVA<sub>sex</sub>  $F_{(1, 36)} = 7.88$ ,  $p = 0.008$ ,  $\eta^2 = 0.45$ ,  $\alpha = 0.79$ ).  $n = 8$  (F Ctrl, M Ctrl), 11 (M ELA), 13 (F ELA).

Source data are provided as a Source Data file.

Endogenous *Crf* expression in CRF x Ai14<sup>tdT</sup> mice verified by *in situ* hybridization

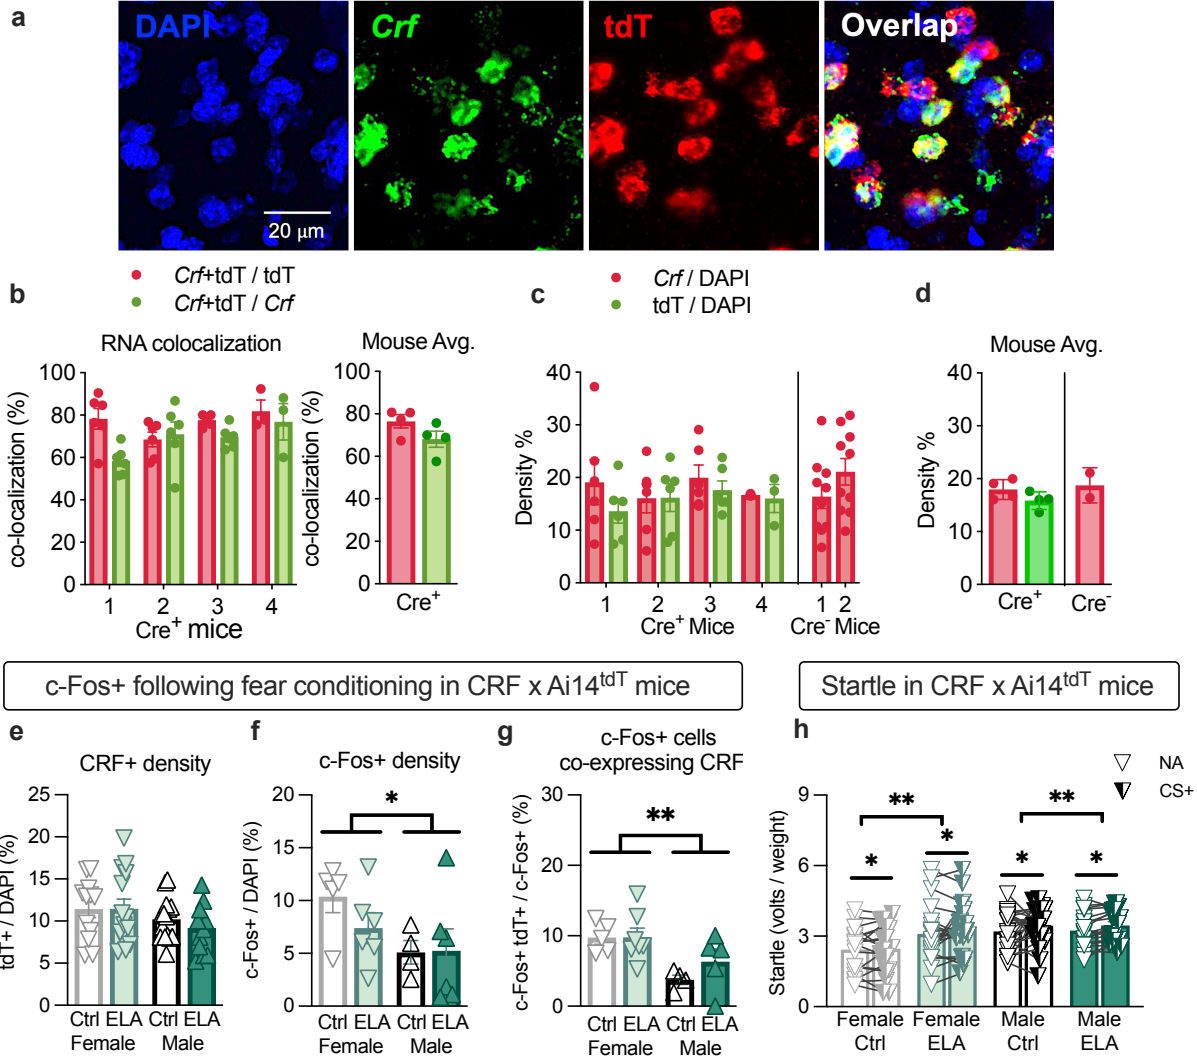

**Supplementary Figure 2: Endogenous *Crf* transcript in CRF x Ai14 mice, c-Fos+ expression following fear conditioning and startle phenotype in CRF x Ai14 mice.**

**a)** Representative image of tdTomato (tdT) transcript and endogenous *Crf* transcript in the CRF-ires-Cre::Ai14<sup>tdTomato</sup> mouse line using RNAscope *in situ* hybridization.

**b)** Co-expression of tdT and *Crf* in tdT cells (red bars) and co-expression of tdT and *Crf* in *Crf* cells (green bars). *Crf* and tdT expression was counted from the left and right hemisphere of 3 CeAL slices (n=6 ROI) in 4 individual mice. The average colocalization of *Crf* and tdT relative to tdT was 76.49% (Mouse 1: 80.58%, Mouse 2: 67.39%, Mouse 3: 77.35%, Mouse 4: 80.65%). The average colocalization of *Crf* and TdT relative to *Crf* was 68.09% (Mouse 1: 57.63%, Mouse 2: 70.05%, Mouse 3: 68.90, Mouse 4: 75.75).

**c)** The density of *Crf* transcript relative to DAPI was quantified in 4 Cre<sup>+</sup> mice (n=6 slices / mouse; Mouse 1: 19.10%, Mouse 2: 16.07%, Mouse 3: 19.95%, Mouse 4: 16.70%) and in 2 Cre<sup>-</sup> mice (n=10 slices / mouse; Mouse 1: 16.38%, Mouse 2: 21.13).

**d)** The average density of endogenous *Crf* transcript expression in the CeAL of Cre<sup>+</sup> mice (avg: 17.95%) was not different to that of Cre<sup>-</sup> mice (avg: 18.74%).

**e)** The density of CRF+ neurons in the CeAL of CRF x A were not significantly impacted by sex, rearing or a sex by rearing interaction (2-way ANOVA<sub>sex</sub>  $F_{(1, 49)} = 2.14$ ,  $p = 0.14$ ,  $\eta^2 = 0.04$ ,  $\alpha = 0.30$ ; 2-way ANOVA<sub>rearing</sub>  $F_{(1, 49)} = 0.47$ ,  $p = 0.49$ ,  $\eta^2 = 0.009$ ,  $\alpha = 0.10$ ; 2-way ANOVA<sub>sex x rearing</sub>  $F_{(1, 49)} = 0.0003$ ,  $p = 0.57$ ,  $\eta^2 = 0.0006$ ,  $\alpha = 0.05$ ).  $n = 12$  (F Ctrl, M ELA), 14 (F ELA), 15 (M Ctrl).

**f)** Percent of c-Fos+ / DAPI following CS+ conditioning was not impacted by sex or ELA rearing (2-way ANOVA<sub>sex</sub>  $F_{(1, 16)} = 3.98$ ,  $p = 0.06$ ,  $\eta^2 = 0.19$ ,  $\alpha = 0.53$ ; 2-way ANOVA<sub>rearing</sub>  $F_{(1, 16)} = 0.19$ ,  $p = 0.66$ ,  $\eta^2 = 0.01$ ,  $\alpha = 0.07$ ).  $n = 5$  (F Ctrl), 6 (F ELA, M ELA), 4 (M Ctrl).

**g)** The percent of c-Fos+ neurons that co-expressed CRF+ was greater in female mice compared to males (2-way ANOVA<sub>sex</sub>  $F_{(1, 16)} = 7.42$ ,  $p = 0.01$ ,  $\eta^2 = 0.31$ ,  $\alpha = 0.80$ ) and was not impacted by ELA rearing (2-way ANOVA<sub>rearing</sub>  $F_{(1, 16)} = 0.45$ ,  $p = 0.50$ ,  $\eta^2 = 0.02$ ,  $\alpha = 0.09$ ; 2-way ANOVA<sub>sex x rearing</sub>  $F_{(1, 16)} = 0.68$ ,  $p = 0.42$ ,  $\eta^2 = 0.04$ ,  $\alpha = 0.13$ ).  $n = 5$  (F Ctrl), 6 (F ELA, M ELA), 4 (M Ctrl).

**h)** ELA rearing increased startle exhibited by CRF x Ai14 mice (3-way RM ANOVA<sub>rearing</sub>  $F_{(1, 79)} = 4.14$ ,  $p = 0.04$ ,  $\eta^2 = 0.23$ ,  $\alpha = 0.99$ ) and was elevated in CS+ trials compared to NA trials (3-way RM ANOVA<sub>cue</sub>  $F_{(1, 79)} = 5.71$ ,  $p = 0.01$ ,  $\eta^2 = 0.06$ ,  $\alpha = 0.62$ ).  $n = 19$  (F Ctrl, M ELA), 22 (F ELA), 23 (M Ctrl).

Source data are provided as a Source Data file.

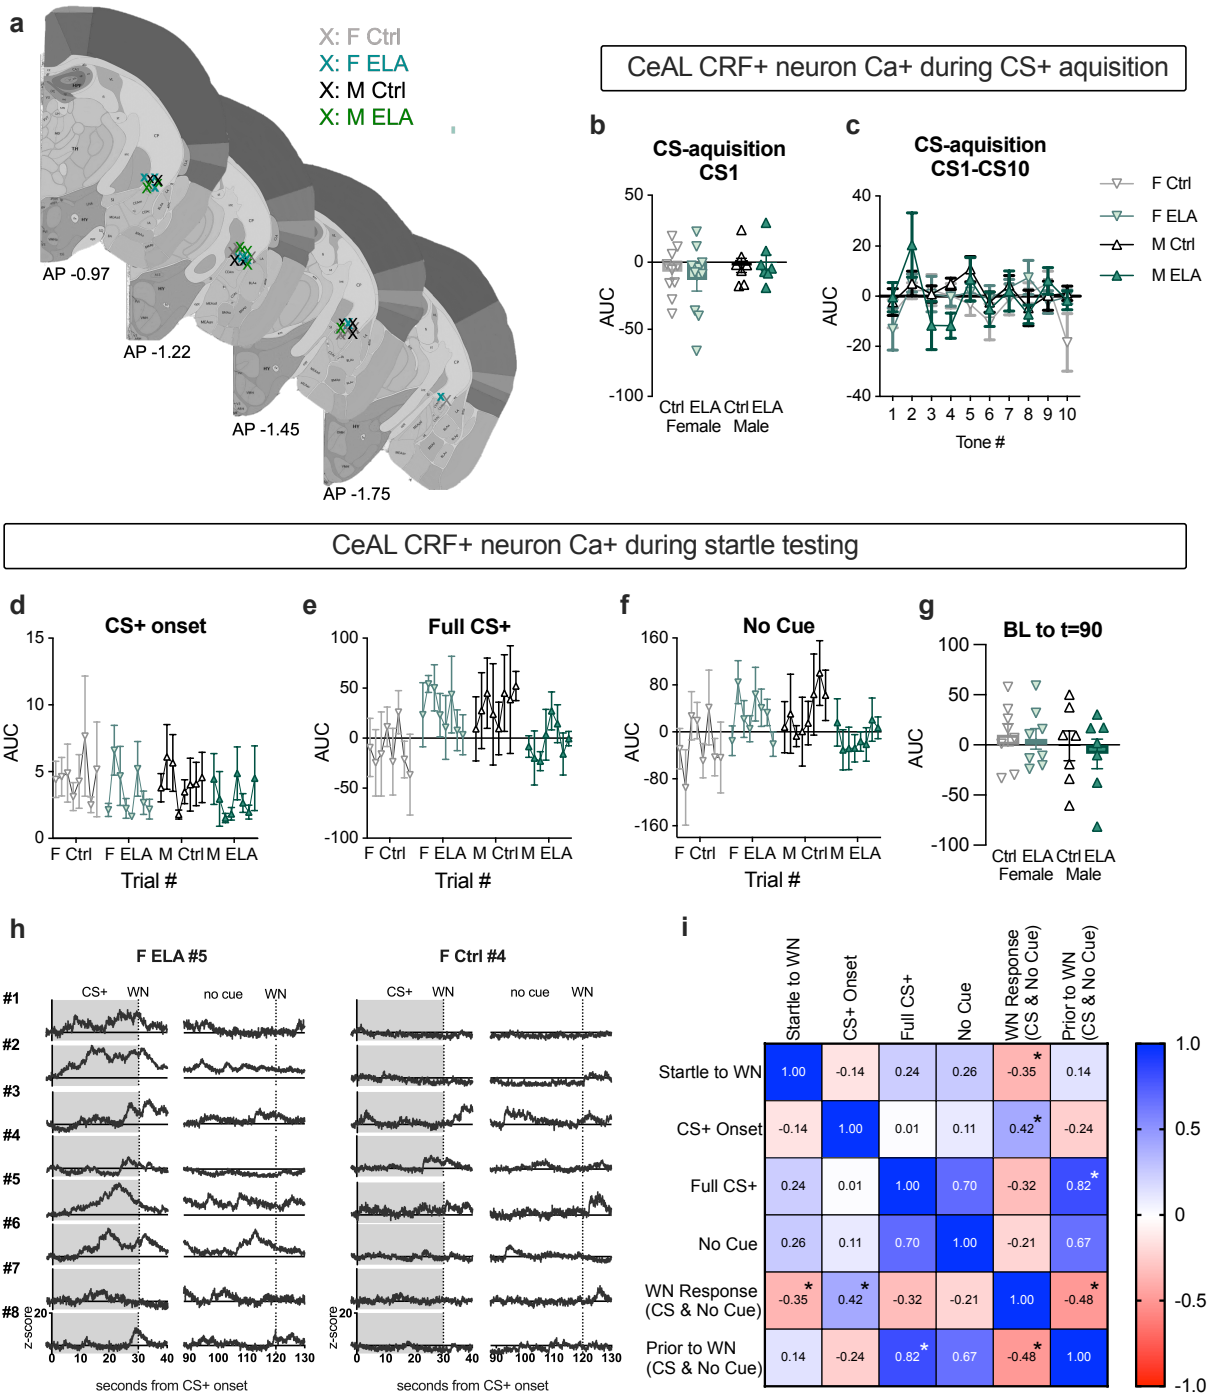

**Supplementary Figure 3: CeAL CRF+ neuron Ca<sup>+</sup> activity during CS+ acquisition and startle testing**

- a)** Map of estimated fiber tip locations in female Ctrl (grey), female ELA (teal), male Ctrl (black), and male ELA (green) mice.
- b)** CRF+ CeAL activity in response to the first tone presentation during CS-acquisition. The AUC was calculated on the z-score traces during the 30 sec tone presentations aligned to tone onset. Activity was not influenced by ELA-rearing and did not differ by sex (3-way ANOVA  $_{rearing}$ :  $F(1, 30) =$

0.09,  $p = 0.766$ ,  $\eta^2 = 0.04$ ,  $\alpha = 0.05$ ; 3-way ANOVA<sub>sex</sub>:  $F_{(1, 30)} = 1.579$ ,  $p = 0.218$ ,  $\eta^2 = 0.22$ ,  $\alpha = 0.25$ ).  $n=8$  (F Ctrl, F ELA), 7 (M Ctrl, M ELA).

- c) CeAL CRF+ neuron activity in response to 10 CS+ presentations during CS-acquisition was not impacted by ELA or sex (3-way ANOVA<sub>rearing</sub>:  $F_{(1, 30)} = 0.064$ ,  $p = 0.80$ ,  $\eta^2 = 0.01$ ,  $\alpha = 0.05$ ; 3-way ANOVA<sub>sex</sub>:  $F_{(1, 30)} = 1.122$ ,  $p = 0.298$ ,  $\eta^2 = 0.01$ ,  $\alpha = 0.07$ ).  $n=8$  (F Ctrl, F ELA), 7 (M Ctrl, M ELA).
- d) AUC during CS+ onset was not impacted by trial # (3-way ANOVA<sub>trial</sub>:  $F_{(3.5, 92.3)} = 1.29$ ,  $p = 0.28$ ,  $\eta^2 = 0.01$ ,  $\alpha = 0.29$ ) or by ELA rearing (3-way ANOVA<sub>rearing</sub>:  $F_{(1, 26)} = 1.53$ ,  $p = 0.22$ ,  $\eta^2 = 0.001$ ,  $\alpha = 0.06$ ).  $n=8$  (F Ctrl, F ELA), 7 (M Ctrl, M ELA).
- e) AUC during full CS+ was not impacted by trial # (3-way ANOVA<sub>trial</sub>:  $F_{(5.5, 138.4)} = 0.48$ ,  $p = 0.80$ ,  $\eta^2 = 0.10$ ,  $\alpha = 0.16$ ) and was differentially impacted by ELA in males and females (3-way ANOVA<sub>sex x rearing</sub>:  $F_{(1, 26)} = 6.06$ ,  $p = 0.02$ ,  $\eta^2 = 0.25$ ,  $\alpha = 0.91$ ).  $n=8$  (F Ctrl, F ELA), 7 (M Ctrl, M ELA).
- f) AUC during the no-cue period normalized to CS+ onset ( $t = 0$ ) was not impacted by trial # (3-way ANOVA<sub>trial</sub>:  $F_{(5.14, 130.1)} = 0.52$ ,  $p = 0.75$ ,  $\eta^2 = 0.10$ ,  $\alpha = 0.10$ ) and was differentially impacted by ELA in males and females (3-way ANOVA<sub>sex x rearing</sub>:  $F_{(1, 26)} = 5.70$ ,  $p = 0.02$ ,  $\eta^2 = 0.14$ ,  $\alpha = 0.34$ ).  $n=8$  (F Ctrl, F ELA), 7 (M Ctrl, M ELA).
- g) AUC calculated from Ca+ traces normalized to  $t = 90$ , to assess CeAL CRF+ neuron activity during the no cue period that was independent of the CS+. AUC was not impacted by sex or rearing condition (2-way ANOVA<sub>sex</sub>:  $F_{(1, 26)} = 1.06$ ,  $p = 0.31$ ,  $\eta^2 = 0.17$ ,  $\alpha = 0.15$ ; 2-way ANOVA<sub>rearing</sub>:  $F_{(1, 26)} = 0.22$ ,  $p = 0.63$ ,  $\eta^2 = 0.08$ ,  $\alpha = 0.07$ ; 2-way ANOVA<sub>sex x rearing</sub>:  $F_{(1, 26)} = 0.02$ ,  $p = 0.87$ ,  $\eta^2 = 0.03$ ,  $\alpha = 0.05$ ).  $n=8$  (F Ctrl, F ELA), 7 (M Ctrl, M ELA).
- h) Example traces from Female ELA #5 and Female Ctrl #4 during 8 presentations of the 30 sec CS+ ( $t=0-30$ ) co-terminating with the WN ( $t=30$ ) and the 30 sec no cue period ( $t=90-120$ ) terminating with the WN ( $t=120$ ). Z-scores were time-locked to the onset of the CS+ for each trial.
- i) Correlation matrix illustrating Spearman R values for the relationship between startle and AUC calculated during CS+ onset, full CS+, no-cue period, response to WN, and prior to WN. Startle to the WN was negatively correlated with Ca+ activity in response to the WN ( $R = -0.35$ ,  $p = 0.05$ ). Ca+ activity to CS+ onset was positively correlated with Ca+ activity in response to the WN ( $R = 0.41$ ,  $p = 0.02$ ). Ca+ activity prior to the WN was positively correlated with Ca+ activity during the full CS+ ( $R = 0.82$ ,  $p < 0.0001$ ). Ca+ activity prior to the WN was negatively correlated with Ca+ activity in response to the WN ( $R = -0.48$ ,  $p = 0.006$ ).  $n=8$  (F Ctrl, F ELA), 7 (M Ctrl, M ELA).  
Source data are provided as a Source Data file.

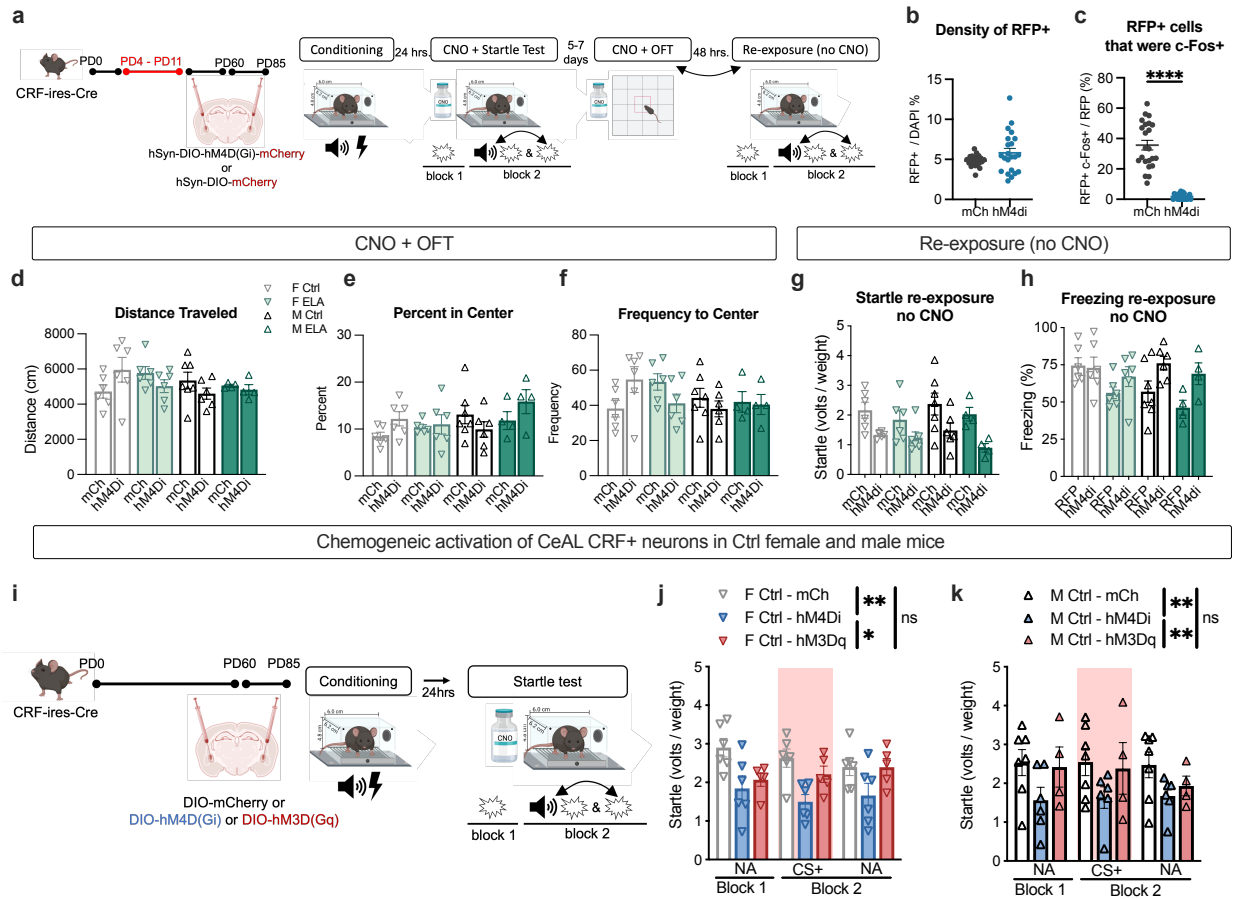

### Supplementary Figure 4: Chemogenetic inhibition and activation of CeAL CRF+ neurons

**a** Experimental design: Adult male (M) and female (F) CRF-ires-Cre mice reared in control (Ctrl) or early life adversity (ELA) conditions received bilateral CeAL injections of AAV-hSyn-DIO-hM4D(Gi)-mCherry or AAV9-hSyn-DIO-mCherry virus. Clozapine N-oxide (CNO) was administered 30 min prior to startle testing. A week later, mice were exposed to an open field following CNO administration and re-exposure to the startle test without CNO. The OFT and re-exposure test presentations were counterbalanced with 48hrs in between testing days.

**b** The density of RFP+ cells were quantified in mCherry- and hM4di-expressing mice to confirm comparable levels of viral expression (Two-tailed Unpaired:  $t = 1.82$ ,  $df = 43$ ,  $p = 0.07$ ,  $d = 0.53$ ,  $\alpha = 0.42$ ).  $n = 23$  (mCh),  $22$  (hM4di).

**c** Co-expression of RFP+ with c-Fos+ was quantified to measure the percent of CRF+ DREADD-expressing cells that were silenced following CNO-administration. Mice expressing the hM4di virus in CeAL CRF+ neurons exhibited significantly reduced c-Fos+ in RFP+ cells compared to mCherry-expressing control mice (Two-tailed unpaired:  $t = 10.35$ ,  $df = 43$ ,  $p < 0.0001$ ,  $d = 3.12$ ,  $\alpha = 1.0$ ).  $n = 23$  (mCh),  $22$  (hM4di).

**d** The distance traveled (cm) in the open field was not impacted by virus, sex, or rearing (3-way ANOVA virus:  $F_{(1, 37)} = 0.15$ ,  $p = 0.69$ ,  $\eta^2 = 0.06$ ,  $\alpha = 0.06$ ; 3-way ANOVA sex:  $F_{(1, 37)} = 1.68$ ,  $p = 0.20$ ,  $\eta^2 = 0.21$ ,  $\alpha = 0.28$ ; 3-way ANOVA rearing:  $F_{(1, 37)} = 0.001$ ,  $p = 0.96$ ,  $\eta^2 = 0.007$ ,  $\alpha = 0.05$ ).  $n = 7$  (mCh M Ctrl),  $n = 6$  (mCh F Ctrl, hM4Di F Ctrl, mCh F ELA, hM4Di F ELA, hM4Di M Ctrl),  $n = 4$  (mCh M ELA, hM4Di M ELA).

**e** The percent spent in the center of the open field was not impacted by virus, sex, or rearing (3-way ANOVA virus:  $F_{(1, 37)} = 1.12$ ,  $p = 0.29$ ,  $\eta^2 = 0.17$ ,  $\alpha = 0.20$ ; 3-way ANOVA sex:  $F_{(1, 37)} = 3.09$ ,  $p = 0.08$ ,  $\eta^2 = 0.28$ ,

$\alpha = 0.47$ ; 3-way ANOVA<sub>rearing</sub>:  $F_{(1, 37)} = 1.27$ ,  $p = 0.26$ ,  $\eta^2 = 0.18$ ,  $\alpha = 0.22$ ).  $n=7$  (mCh M Ctrl),  $n= 6$ (mCh F Ctrl, hM4Di F Ctrl, mCh F ELA, hM4Di F ELA, hM4Di M Ctrl),  $n=4$  (mCh M ELA, hM4Di M ELA).

**f)** The frequency to the center of the open field was not impacted by virus, sex, or rearing (3-way ANOVA<sub>virus</sub>:  $F_{(1, 37)} = 0.04$ ,  $p = 0.83$ ,  $\eta^2 = 0.03$ ,  $\alpha = 0.05$ ; 3-way ANOVA<sub>sex</sub>:  $F_{(1, 37)} = 1.98$ ,  $p = 0.16$ ,  $\eta^2 = 0.23$ ,  $\alpha = 0.32$ ; 3-way ANOVA<sub>rearing</sub>:  $F_{(1, 37)} = 0.01$ ,  $p = 0.90$ ,  $\eta^2 = 0.01$ ,  $\alpha = 0.05$ ). Post-hoc multiple comparisons conducted to explore a virus x sex x rearing interaction (3-way ANOVA<sub>virus x sex x rearing</sub>:  $F_{(1, 37)} = 4.36$ ,  $p = 0.04$ ,  $\eta^2 = 0.34$ ,  $\alpha = 0.61$ ) did not reveal significant differences between groups ( $p > 0.05$ ).  $n=7$  (mCh M Ctrl),  $n= 6$ (mCh F Ctrl, hM4Di F Ctrl, mCh F ELA, hM4Di F ELA, hM4Di M Ctrl),  $n=4$  (mCh M ELA, hM4Di M ELA).

**g)** The avg. startle upon re-exposure to the startle paradigm without CNO administration revealed a main effect of virus (3-way ANOVA<sub>virus</sub>:  $F_{(1,27)} = 20.64$ ,  $p < 0.0001$ ,  $\eta^2 = 0.74$ ,  $\alpha = 0.99$ ) and was not differentially influenced by sex or rearing (3-way ANOVA<sub>sex</sub>:  $F_{(1,37)} = 0.06$ ,  $p = 0.80$ ,  $\eta^2 = 0.04$ ,  $\alpha = 0.05$ ; 3-way ANOVA<sub>rearing</sub>:  $F_{(1,37)} = 3.06$ ,  $p = 0.08$ ,  $\eta^2 = 0.28$ ,  $\alpha = 0.46$ ).  $n=7$  (mCh M Ctrl),  $n= 6$ (mCh F Ctrl, hM4Di F Ctrl, mCh F ELA, hM4Di F ELA, hM4Di M Ctrl),  $n=4$  (mCh M ELA, hM4Di M ELA).

**h)** The percent freezing upon re-exposure without CNO averaged across trials was influenced by viral expression and rearing but not sex (3-way ANOVA<sub>virus</sub>:  $F_{(1,37)} = 8.28$ ,  $p = 0.006$ ,  $\eta^2 = 0.47$ ,  $\alpha = 0.87$ ; 3-way ANOVA<sub>rearing</sub>:  $F_{(1,37)} = 5.61$ ,  $p = 0.02$ ,  $\eta^2 = 0.38$ ,  $\alpha = 0.72$ ; 3-way ANOVA<sub>sex</sub>:  $F_{(1,37)} = 1.61$ ,  $p = 0.21$ ,  $\eta^2 = 0.20$ ,  $\alpha = 0.27$ ).  $n=7$  (mCh M Ctrl),  $n= 6$ (mCh F Ctrl, hM4Di F Ctrl, mCh F ELA, hM4Di F ELA, hM4Di M Ctrl),  $n=4$  (mCh M ELA, hM4Di M ELA).

**i)** Chemogenetic activation experimental design: Mice received bilateral CeAL injections of AAV-hSyn-DIO-hM4D(Gi)-mCherry, AAV-hSyn-DIO-hM3D(Gq)-mCherry, or AAV9-hSyn-DIO-mCherry virus. The effect of chemogenetic activation or inhibition of CeAL CRF+ neurons in female and male control reared mice was measured during startle testing. Illustration was created using BioRender.com.

**j)** A main effect of virus (1-way ANOVA<sub>virus</sub>:  $F_{(2, 6)} = 17.91$ ,  $p = 0.001$ ,  $\eta^2 = 0.46$ ,  $\alpha = 0.87$ ) revealed that startle was significantly lower in control female mice expressing hM4Di virus compared to both mCherry control ( $p = 0.003$ ) and hM3Dq ( $p = 0.04$ ) virus.  $n = 6$  (mCh F Ctrl, hM4Di F Ctrl), 5 (hM3Dq F Ctrl).

**k)** A main effect of virus (1-way ANOVA<sub>virus</sub>:  $F_{(2, 6)} = 24.14$ ,  $p = 0.001$ ,  $\eta^2 = 0.47$ ,  $\alpha = 0.88$ ) revealed that startle was significantly lower in control male mice expressing hM4Di virus compared to mCherry control ( $p = 0.001$ ) and hM3D1 ( $p = 0.009$ ).  $n = 7$  (mCh M Ctrl), 6 (hM4Di M Ctrl), 4 (hM3Dq M Ctrl).

Source data are provided as a Source Data file. Supplemental Figure 4a,i created with BioRender.com released under a Creative Commons Attribution-NonCommercial-NoDerivs 4.0 International license.
